# Supplementary material for: Five for Sidney. 2001 International Science School in Sidney.
Source: MDPI journal article supplement (doi:10.3390/molecules27154861), 2002-01-01
Supplement: s1 [file s1]

# **Biofilm-i: A platform for predicting biofilm inhibitors using Quantitative structure–activity relationship (QSAR) based regression models to curb antibiotic resistance**

**Akanksha Rajput<sup>1</sup>, Kailash T. Bhamare<sup>1,2</sup>, Anamika Thakur<sup>1,2</sup> and Manoj Kumar<sup>1,2\*</sup>**

<sup>1</sup>Virology Unit and Bioinformatics Centre, Institute of Microbial Technology, Council of Scientific and Industrial Research (CSIR), Sector 39-A, Chandigarh-160036, India

<sup>2</sup>Academy of Scientific and Innovative Research (AcSIR), Ghaziabad-201002, India

## **\* Correspondence:**

Corresponding Author  
[manojk@imtech.res.in](mailto:manojk@imtech.res.in)

## **Supplementary information**

**Figure S1.** Scaffold cloud view of 884 experimentally validated biofilm inhibitors where biofilm inhibition efficiency shown in colors (blue color depicts 0% and green color displays 100%)

**Figure S2.** Input output of generalised predictor available in biofilm-i web portal

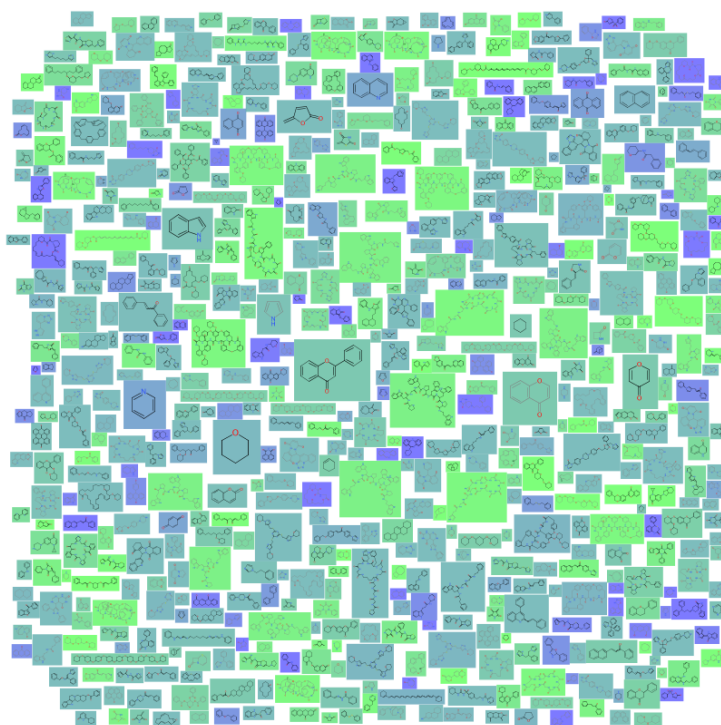

**Figure S1.** Scaffold cloud view of 884 experimentally validated biofilm inhibitors where biofilm inhibition efficiency shown in colors (blue color depicts 0% and green color displays 100%)

**BIOFILM-i**  
A platform for predicting biofilm inhibitors  
to curb antibiotic resistance

HOME PREDICTOR ALGORITHM TOOLS ANALYSES MORE

**GENERALISED**

Biofilm-i contains SIX different Quantitative structure-activity relationship (QSAR) models to identify the biofilm inhibition potency.

**Generalised Predictor**  
(To predict biofilm inhibition efficacy of chemical(s))

**Staphylococcus Aureus**  
(Random Specific Predictor)  
To predict biofilm inhibition efficacy of chemical(s) against S. aureus (Gram +ve & MSSA/SRSA bacteria)

**Escherichia Coli**  
(Random Specific Predictor)  
To predict biofilm inhibition efficacy of chemical(s) against E. coli (Gram -ve model bacterial)

**Pseudomonas Aeruginosa**  
(Random Specific Predictor)  
To predict biofilm inhibition efficacy of chemical(s) against P. aeruginosa (Gram -ve & MSSA/SRSA bacteria)

**Candida Albicans**  
(Random Specific Predictor)  
To predict biofilm inhibition efficacy of chemical(s) against C. albicans (Fungi or yeast)

**Anti-Biofilm Peptides**  
(To predict biofilm inhibition efficacy of peptides)

**PREDICT THE BIOFILM INHIBITION EFFICACY (GENERALIZED) OF THE QUERY CHEMICAL(S) IN BATCH MODE**

This submission from allows user to upload one or more chemical compounds in SDF format. If the user is not having SDF file format and would like to convert the format, it can be done by using the [conversion tool](#) available on our website and paste it here.

Paste your structure(s) in SDF format

Submit

Download by: The Biochemists

Send Address (Optional)

Submit

**PREDICTED RESULTS OF GENERALIZED PREDICTOR OF QUERY CHEMICAL(S)**

This output is displayed as a table of results for the query chemical(s).

| S.No. | Query ID | Chemical Structure | Chemical Name | Chemical SMILES                                                                                                                                                                                                                                                                                                                                                                                                                                                                                                                                                                                                                                                                                                                                                                                                                                                                                                                                                                                                                                                                                                                                                                                                                                                                                                                                                                                                                                                                                                                                                                                                                                                                                                                                                                                                                                                                                                                                                                                                                                                                                                                                                                                                                                                                                                                                                                                                                                                                                                                                                                                                                                                                                                                                                                                                                                                                                                                                                                                                                                                                                                                                                                                                                                                                                                                                                                                                                                                                                                                                                                                                                                                                                                                                                                                                                                                                                                                                                                                                                                                                                                                                                                                                                                                                                                                                                                                                                                                                                                                                                                                                                                                                                                                                                                                                                                                                                                                                                                                                                                                                                                                                                                                                                                                                                                                                                                                                                                                                                                                                                                                                                                                                                                                                                                                                                                                                                                                                                                                                                                                                                                                                                                                                                                                                                                                                                                                                                                                                                                                                                                                                                                                                                                                                                                                                                                                                                                                                                                                                                                                                                                                                                                                                                                                                                                                                                                                                                                                                                                                                                                                                                                                                                                                                                                                                                                                                                                                                                                                                                                                                                                                                                                                                                                                                                                                                                                                                                                                                                                                                                                                                                                                                                                                                                                                                                                                                                                                                                                                                                                                                                                                                                                                                                                                                                                                                                                                                                                                                                                                                                                                                                                                                                                                                                                                                                                                                                                                                                                                                                                                                                                                                                                                                                                                                                                                                                                                                                                                                                                                                                                                                                                                                                                                                                                                                                                                                                                                                                                                                                                                                                                                                                                                                                                                                                                                                                                                                                                                                                                                                                                                                                                                                                                                                                                                                                                                                                                                                                                                                                                                                                                                                                                                                                                                                                                                                                                                                                                                                                                                                                                                                                                                                                                                                                                                                                                                                                                                                                                                                                                                                                                                                                                                                                                                                                                                                                                                                                                                                                                                                                                                                                                                                                                                                                                                                                                                                                                                                                                                                                                                                                                                                                                                                                                                                                                                                                                                                                                                                                                                                                                                                                                                                                                                                                                                          | Chemical Weight | Chemical Description | Search in aBiofilm |
|-------|----------|--------------------|---------------|----------------------------------------------------------------------------------------------------------------------------------------------------------------------------------------------------------------------------------------------------------------------------------------------------------------------------------------------------------------------------------------------------------------------------------------------------------------------------------------------------------------------------------------------------------------------------------------------------------------------------------------------------------------------------------------------------------------------------------------------------------------------------------------------------------------------------------------------------------------------------------------------------------------------------------------------------------------------------------------------------------------------------------------------------------------------------------------------------------------------------------------------------------------------------------------------------------------------------------------------------------------------------------------------------------------------------------------------------------------------------------------------------------------------------------------------------------------------------------------------------------------------------------------------------------------------------------------------------------------------------------------------------------------------------------------------------------------------------------------------------------------------------------------------------------------------------------------------------------------------------------------------------------------------------------------------------------------------------------------------------------------------------------------------------------------------------------------------------------------------------------------------------------------------------------------------------------------------------------------------------------------------------------------------------------------------------------------------------------------------------------------------------------------------------------------------------------------------------------------------------------------------------------------------------------------------------------------------------------------------------------------------------------------------------------------------------------------------------------------------------------------------------------------------------------------------------------------------------------------------------------------------------------------------------------------------------------------------------------------------------------------------------------------------------------------------------------------------------------------------------------------------------------------------------------------------------------------------------------------------------------------------------------------------------------------------------------------------------------------------------------------------------------------------------------------------------------------------------------------------------------------------------------------------------------------------------------------------------------------------------------------------------------------------------------------------------------------------------------------------------------------------------------------------------------------------------------------------------------------------------------------------------------------------------------------------------------------------------------------------------------------------------------------------------------------------------------------------------------------------------------------------------------------------------------------------------------------------------------------------------------------------------------------------------------------------------------------------------------------------------------------------------------------------------------------------------------------------------------------------------------------------------------------------------------------------------------------------------------------------------------------------------------------------------------------------------------------------------------------------------------------------------------------------------------------------------------------------------------------------------------------------------------------------------------------------------------------------------------------------------------------------------------------------------------------------------------------------------------------------------------------------------------------------------------------------------------------------------------------------------------------------------------------------------------------------------------------------------------------------------------------------------------------------------------------------------------------------------------------------------------------------------------------------------------------------------------------------------------------------------------------------------------------------------------------------------------------------------------------------------------------------------------------------------------------------------------------------------------------------------------------------------------------------------------------------------------------------------------------------------------------------------------------------------------------------------------------------------------------------------------------------------------------------------------------------------------------------------------------------------------------------------------------------------------------------------------------------------------------------------------------------------------------------------------------------------------------------------------------------------------------------------------------------------------------------------------------------------------------------------------------------------------------------------------------------------------------------------------------------------------------------------------------------------------------------------------------------------------------------------------------------------------------------------------------------------------------------------------------------------------------------------------------------------------------------------------------------------------------------------------------------------------------------------------------------------------------------------------------------------------------------------------------------------------------------------------------------------------------------------------------------------------------------------------------------------------------------------------------------------------------------------------------------------------------------------------------------------------------------------------------------------------------------------------------------------------------------------------------------------------------------------------------------------------------------------------------------------------------------------------------------------------------------------------------------------------------------------------------------------------------------------------------------------------------------------------------------------------------------------------------------------------------------------------------------------------------------------------------------------------------------------------------------------------------------------------------------------------------------------------------------------------------------------------------------------------------------------------------------------------------------------------------------------------------------------------------------------------------------------------------------------------------------------------------------------------------------------------------------------------------------------------------------------------------------------------------------------------------------------------------------------------------------------------------------------------------------------------------------------------------------------------------------------------------------------------------------------------------------------------------------------------------------------------------------------------------------------------------------------------------------------------------------------------------------------------------------------------------------------------------------------------------------------------------------------------------------------------------------------------------------------------------------------------------------------------------------------------------------------------------------------------------------------------------------------------------------------------------------------------------------------------------------------------------------------------------------------------------------------------------------------------------------------------------------------------------------------------------------------------------------------------------------------------------------------------------------------------------------------------------------------------------------------------------------------------------------------------------------------------------------------------------------------------------------------------------------------------------------------------------------------------------------------------------------------------------------------------------------------------------------------------------------------------------------------------------------------------------------------------------------------------------------------------------------------------------------------------------------------------------------------------------------------------------------------------------------------------------------------------------------------------------------------------------------------------------------------------------------------------------------------------------------------------------------------------------------------------------------------------------------------------------------------------------------------------------------------------------------------------------------------------------------------------------------------------------------------------------------------------------------------------------------------------------------------------------------------------------------------------------------------------------------------------------------------------------------------------------------------------------------------------------------------------------------------------------------------------------------------------------------------------------------------------------------------------------------------------------------------------------------------------------------------------------------------------------------------------------------------------------------------------------------------------------------------------------------------------------------------------------------------------------------------------------------------------------------------------------------------------------------------------------------------------------------------------------------------------------------------------------------------------------------------------------------------------------------------------------------------------------------------------------------------------------------------------------------------------------------------------------------------------------------------------------------------------------------------------------------------------------------------------------------------------------------------------------------------------------------------------------------------------------------------------------------------------------------------------------------------------------------------------------------------------------------------------------------------------------------------------------------------------------------------------------------------------------------------------------------------------------------------------------------------------------------------------------------------------------------------------------------------------------------------------------------------------------------------------------------------------------------------------------------------------------------------------------------------------------------------------------------------------------------------------------------------------------------------------------------------------------------------------------------------------------------------------------------------------------------------------------------------------------------------------------------------------------------------------------------------------------------------------------------------------------------------------------------------------------------------------------------------------------------------------------------------------------------------------------------------------------------------------------------------------------------------------------------------------------------------------------------------------------------------------------------------------------------------------------------------------------------------------------------------------------------------------------------------------------------------------------------------------------------------------------------------------------------------------------------------------------------------------------------------------|-----------------|----------------------|--------------------|
| 1     | 400863   |                    | 400863        | <chem>CC1=CC=CC=C1C2=CC=CC=C2C3=CC=CC=C3C4=CC=CC=C4C5=CC=CC=C5C6=CC=CC=C6C7=CC=CC=C7C8=CC=CC=C8C9=CC=CC=C9C10=CC=CC=C10C11=CC=CC=C11C12=CC=CC=C12C13=CC=CC=C13C14=CC=CC=C14C15=CC=CC=C15C16=CC=CC=C16C17=CC=CC=C17C18=CC=CC=C18C19=CC=CC=C19C20=CC=CC=C20C21=CC=CC=C21C22=CC=CC=C22C23=CC=CC=C23C24=CC=CC=C24C25=CC=CC=C25C26=CC=CC=C26C27=CC=CC=C27C28=CC=CC=C28C29=CC=CC=C29C30=CC=CC=C30C31=CC=CC=C31C32=CC=CC=C32C33=CC=CC=C33C34=CC=CC=C34C35=CC=CC=C35C36=CC=CC=C36C37=CC=CC=C37C38=CC=CC=C38C39=CC=CC=C39C40=CC=CC=C40C41=CC=CC=C41C42=CC=CC=C42C43=CC=CC=C43C44=CC=CC=C44C45=CC=CC=C45C46=CC=CC=C46C47=CC=CC=C47C48=CC=CC=C48C49=CC=CC=C49C50=CC=CC=C50C51=CC=CC=C51C52=CC=CC=C52C53=CC=CC=C53C54=CC=CC=C54C55=CC=CC=C55C56=CC=CC=C56C57=CC=CC=C57C58=CC=CC=C58C59=CC=CC=C59C60=CC=CC=C60C61=CC=CC=C61C62=CC=CC=C62C63=CC=CC=C63C64=CC=CC=C64C65=CC=CC=C65C66=CC=CC=C66C67=CC=CC=C67C68=CC=CC=C68C69=CC=CC=C69C70=CC=CC=C70C71=CC=CC=C71C72=CC=CC=C72C73=CC=CC=C73C74=CC=CC=C74C75=CC=CC=C75C76=CC=CC=C76C77=CC=CC=C77C78=CC=CC=C78C79=CC=CC=C79C80=CC=CC=C80C81=CC=CC=C81C82=CC=CC=C82C83=CC=CC=C83C84=CC=CC=C84C85=CC=CC=C85C86=CC=CC=C86C87=CC=CC=C87C88=CC=CC=C88C89=CC=CC=C89C90=CC=CC=C90C91=CC=CC=C91C92=CC=CC=C92C93=CC=CC=C93C94=CC=CC=C94C95=CC=CC=C95C96=CC=CC=C96C97=CC=CC=C97C98=CC=CC=C98C99=CC=CC=C99C100=CC=CC=C100C101=CC=CC=C101C102=CC=CC=C102C103=CC=CC=C103C104=CC=CC=C104C105=CC=CC=C105C106=CC=CC=C106C107=CC=CC=C107C108=CC=CC=C108C109=CC=CC=C109C110=CC=CC=C110C111=CC=CC=C111C112=CC=CC=C112C113=CC=CC=C113C114=CC=CC=C114C115=CC=CC=C115C116=CC=CC=C116C117=CC=CC=C117C118=CC=CC=C118C119=CC=CC=C119C120=CC=CC=C120C121=CC=CC=C121C122=CC=CC=C122C123=CC=CC=C123C124=CC=CC=C124C125=CC=CC=C125C126=CC=CC=C126C127=CC=CC=C127C128=CC=CC=C128C129=CC=CC=C129C130=CC=CC=C130C131=CC=CC=C131C132=CC=CC=C132C133=CC=CC=C133C134=CC=CC=C134C135=CC=CC=C135C136=CC=CC=C136C137=CC=CC=C137C138=CC=CC=C138C139=CC=CC=C139C140=CC=CC=C140C141=CC=CC=C141C142=CC=CC=C142C143=CC=CC=C143C144=CC=CC=C144C145=CC=CC=C145C146=CC=CC=C146C147=CC=CC=C147C148=CC=CC=C148C149=CC=CC=C149C150=CC=CC=C150C151=CC=CC=C151C152=CC=CC=C152C153=CC=CC=C153C154=CC=CC=C154C155=CC=CC=C155C156=CC=CC=C156C157=CC=CC=C157C158=CC=CC=C158C159=CC=CC=C159C160=CC=CC=C160C161=CC=CC=C161C162=CC=CC=C162C163=CC=CC=C163C164=CC=CC=C164C165=CC=CC=C165C166=CC=CC=C166C167=CC=CC=C167C168=CC=CC=C168C169=CC=CC=C169C170=CC=CC=C170C171=CC=CC=C171C172=CC=CC=C172C173=CC=CC=C173C174=CC=CC=C174C175=CC=CC=C175C176=CC=CC=C176C177=CC=CC=C177C178=CC=CC=C178C179=CC=CC=C179C180=CC=CC=C180C181=CC=CC=C181C182=CC=CC=C182C183=CC=CC=C183C184=CC=CC=C184C185=CC=CC=C185C186=CC=CC=C186C187=CC=CC=C187C188=CC=CC=C188C189=CC=CC=C189C190=CC=CC=C190C191=CC=CC=C191C192=CC=CC=C192C193=CC=CC=C193C194=CC=CC=C194C195=CC=CC=C195C196=CC=CC=C196C197=CC=CC=C197C198=CC=CC=C198C199=CC=CC=C199C200=CC=CC=C200C201=CC=CC=C201C202=CC=CC=C202C203=CC=CC=C203C204=CC=CC=C204C205=CC=CC=C205C206=CC=CC=C206C207=CC=CC=C207C208=CC=CC=C208C209=CC=CC=C209C210=CC=CC=C210C211=CC=CC=C211C212=CC=CC=C212C213=CC=CC=C213C214=CC=CC=C214C215=CC=CC=C215C216=CC=CC=C216C217=CC=CC=C217C218=CC=CC=C218C219=CC=CC=C219C220=CC=CC=C220C221=CC=CC=C221C222=CC=CC=C222C223=CC=CC=C223C224=CC=CC=C224C225=CC=CC=C225C226=CC=CC=C226C227=CC=CC=C227C228=CC=CC=C228C229=CC=CC=C229C230=CC=CC=C230C231=CC=CC=C231C232=CC=CC=C232C233=CC=CC=C233C234=CC=CC=C234C235=CC=CC=C235C236=CC=CC=C236C237=CC=CC=C237C238=CC=CC=C238C239=CC=CC=C239C240=CC=CC=C240C241=CC=CC=C241C242=CC=CC=C242C243=CC=CC=C243C244=CC=CC=C244C245=CC=CC=C245C246=CC=CC=C246C247=CC=CC=C247C248=CC=CC=C248C249=CC=CC=C249C250=CC=CC=C250C251=CC=CC=C251C252=CC=CC=C252C253=CC=CC=C253C254=CC=CC=C254C255=CC=CC=C255C256=CC=CC=C256C257=CC=CC=C257C258=CC=CC=C258C259=CC=CC=C259C260=CC=CC=C260C261=CC=CC=C261C262=CC=CC=C262C263=CC=CC=C263C264=CC=CC=C264C265=CC=CC=C265C266=CC=CC=C266C267=CC=CC=C267C268=CC=CC=C268C269=CC=CC=C269C270=CC=CC=C270C271=CC=CC=C271C272=CC=CC=C272C273=CC=CC=C273C274=CC=CC=C274C275=CC=CC=C275C276=CC=CC=C276C277=CC=CC=C277C278=CC=CC=C278C279=CC=CC=C279C280=CC=CC=C280C281=CC=CC=C281C282=CC=CC=C282C283=CC=CC=C283C284=CC=CC=C284C285=CC=CC=C285C286=CC=CC=C286C287=CC=CC=C287C288=CC=CC=C288C289=CC=CC=C289C290=CC=CC=C290C291=CC=CC=C291C292=CC=CC=C292C293=CC=CC=C293C294=CC=CC=C294C295=CC=CC=C295C296=CC=CC=C296C297=CC=CC=C297C298=CC=CC=C298C299=CC=CC=C299C300=CC=CC=C300C301=CC=CC=C301C302=CC=CC=C302C303=CC=CC=C303C304=CC=CC=C304C305=CC=CC=C305C306=CC=CC=C306C307=CC=CC=C307C308=CC=CC=C308C309=CC=CC=C309C310=CC=CC=C310C311=CC=CC=C311C312=CC=CC=C312C313=CC=CC=C313C314=CC=CC=C314C315=CC=CC=C315C316=CC=CC=C316C317=CC=CC=C317C318=CC=CC=C318C319=CC=CC=C319C320=CC=CC=C320C321=CC=CC=C321C322=CC=CC=C322C323=CC=CC=C323C324=CC=CC=C324C325=CC=CC=C325C326=CC=CC=C326C327=CC=CC=C327C328=CC=CC=C328C329=CC=CC=C329C330=CC=CC=C330C331=CC=CC=C331C332=CC=CC=C332C333=CC=CC=C333C334=CC=CC=C334C335=CC=CC=C335C336=CC=CC=C336C337=CC=CC=C337C338=CC=CC=C338C339=CC=CC=C339C340=CC=CC=C340C341=CC=CC=C341C342=CC=CC=C342C343=CC=CC=C343C344=CC=CC=C344C345=CC=CC=C345C346=CC=CC=C346C347=CC=CC=C347C348=CC=CC=C348C349=CC=CC=C349C350=CC=CC=C350C351=CC=CC=C351C352=CC=CC=C352C353=CC=CC=C353C354=CC=CC=C354C355=CC=CC=C355C356=CC=CC=C356C357=CC=CC=C357C358=CC=CC=C358C359=CC=CC=C359C360=CC=CC=C360C361=CC=CC=C361C362=CC=CC=C362C363=CC=CC=C363C364=CC=CC=C364C365=CC=CC=C365C366=CC=CC=C366C367=CC=CC=C367C368=CC=CC=C368C369=CC=CC=C369C370=CC=CC=C370C371=CC=CC=C371C372=CC=CC=C372C373=CC=CC=C373C374=CC=CC=C374C375=CC=CC=C375C376=CC=CC=C376C377=CC=CC=C377C378=CC=CC=C378C379=CC=CC=C379C380=CC=CC=C380C381=CC=CC=C381C382=CC=CC=C382C383=CC=CC=C383C384=CC=CC=C384C385=CC=CC=C385C386=CC=CC=C386C387=CC=CC=C387C388=CC=CC=C388C389=CC=CC=C389C390=CC=CC=C390C391=CC=CC=C391C392=CC=CC=C392C393=CC=CC=C393C394=CC=CC=C394C395=CC=CC=C395C396=CC=CC=C396C397=CC=CC=C397C398=CC=CC=C398C399=CC=CC=C399C400=CC=CC=C400C401=CC=CC=C401C402=CC=CC=C402C403=CC=CC=C403C404=CC=CC=C404C405=CC=CC=C405C406=CC=CC=C406C407=CC=CC=C407C408=CC=CC=C408C409=CC=CC=C409C410=CC=CC=C410C411=CC=CC=C411C412=CC=CC=C412C413=CC=CC=C413C414=CC=CC=C414C415=CC=CC=C415C416=CC=CC=C416C417=CC=CC=C417C418=CC=CC=C418C419=CC=CC=C419C420=CC=CC=C420C421=CC=CC=C421C422=CC=CC=C422C423=CC=CC=C423C424=CC=CC=C424C425=CC=CC=C425C426=CC=CC=C426C427=CC=CC=C427C428=CC=CC=C428C429=CC=CC=C429C430=CC=CC=C430C431=CC=CC=C431C432=CC=CC=C432C433=CC=CC=C433C434=CC=CC=C434C435=CC=CC=C435C436=CC=CC=C436C437=CC=CC=C437C438=CC=CC=C438C439=CC=CC=C439C440=CC=CC=C440C441=CC=CC=C441C442=CC=CC=C442C443=CC=CC=C443C444=CC=CC=C444C445=CC=CC=C445C446=CC=CC=C446C447=CC=CC=C447C448=CC=CC=C448C449=CC=CC=C449C450=CC=CC=C450C451=CC=CC=C451C452=CC=CC=C452C453=CC=CC=C453C454=CC=CC=C454C455=CC=CC=C455C456=CC=CC=C456C457=CC=CC=C457C458=CC=CC=C458C459=CC=CC=C459C460=CC=CC=C460C461=CC=CC=C461C462=CC=CC=C462C463=CC=CC=C463C464=CC=CC=C464C465=CC=CC=C465C466=CC=CC=C466C467=CC=CC=C467C468=CC=CC=C468C469=CC=CC=C469C470=CC=CC=C470C471=CC=CC=C471C472=CC=CC=C472C473=CC=CC=C473C474=CC=CC=C474C475=CC=CC=C475C476=CC=CC=C476C477=CC=CC=C477C478=CC=CC=C478C479=CC=CC=C479C480=CC=CC=C480C481=CC=CC=C481C482=CC=CC=C482C483=CC=CC=C483C484=CC=CC=C484C485=CC=CC=C485C486=CC=CC=C486C487=CC=CC=C487C488=CC=CC=C488C489=CC=CC=C489C490=CC=CC=C490C491=CC=CC=C491C492=CC=CC=C492C493=CC=CC=C493C494=CC=CC=C494C495=CC=CC=C495C496=CC=CC=C496C497=CC=CC=C497C498=CC=CC=C498C499=CC=CC=C499C500=CC=CC=C500C501=CC=CC=C501C502=CC=CC=C502C503=CC=CC=C503C504=CC=CC=C504C505=CC=CC=C505C506=CC=CC=C506C507=CC=CC=C507C508=CC=CC=C508C509=CC=CC=C509C510=CC=CC=C510C511=CC=CC=C511C512=CC=CC=C512C513=CC=CC=C513C514=CC=CC=C514C515=CC=CC=C515C516=CC=CC=C516C517=CC=CC=C517C518=CC=CC=C518C519=CC=CC=C519C520=CC=CC=C520C521=CC=CC=C521C522=CC=CC=C522C523=CC=CC=C523C524=CC=CC=C524C525=CC=CC=C525C526=CC=CC=C526C527=CC=CC=C527C528=CC=CC=C528C529=CC=CC=C529C530=CC=CC=C530C531=CC=CC=C531C532=CC=CC=C532C533=CC=CC=C533C534=CC=CC=C534C535=CC=CC=C535C536=CC=CC=C536C537=CC=CC=C537C538=CC=CC=C538C539=CC=CC=C539C540=CC=CC=C540C541=CC=CC=C541C542=CC=CC=C542C543=CC=CC=C543C544=CC=CC=C544C545=CC=CC=C545C546=CC=CC=C546C547=CC=CC=C547C548=CC=CC=C548C549=CC=CC=C549C550=CC=CC=C550C551=CC=CC=C551C552=CC=CC=C552C553=CC=CC=C553C554=CC=CC=C554C555=CC=CC=C555C556=CC=CC=C556C557=CC=CC=C557C558=CC=CC=C558C559=CC=CC=C559C560=CC=CC=C560C561=CC=CC=C561C562=CC=CC=C562C563=CC=CC=C563C564=CC=CC=C564C565=CC=CC=C565C566=CC=CC=C566C567=CC=CC=C567C568=CC=CC=C568C569=CC=CC=C569C570=CC=CC=C570C571=CC=CC=C571C572=CC=CC=C572C573=CC=CC=C573C574=CC=CC=C574C575=CC=CC=C575C576=CC=CC=C576C577=CC=CC=C577C578=CC=CC=C578C579=CC=CC=C579C580=CC=CC=C580C581=CC=CC=C581C582=CC=CC=C582C583=CC=CC=C583C584=CC=CC=C584C585=CC=CC=C585C586=CC=CC=C586C587=CC=CC=C587C588=CC=CC=C588C589=CC=CC=C589C590=CC=CC=C590C591=CC=CC=C591C592=CC=CC=C592C593=CC=CC=C593C594=CC=CC=C594C595=CC=CC=C595C596=CC=CC=C596C597=CC=CC=C597C598=CC=CC=C598C599=CC=CC=C599C600=CC=CC=C600C601=CC=CC=C601C602=CC=CC=C602C603=CC=CC=C603C604=CC=CC=C604C605=CC=CC=C605C606=CC=CC=C606C607=CC=CC=C607C608=CC=CC=C608C609=CC=CC=C609C610=CC=CC=C610C611=CC=CC=C611C612=CC=CC=C612C613=CC=CC=C613C614=CC=CC=C614C615=CC=CC=C615C616=CC=CC=C616C617=CC=CC=C617C618=CC=CC=C618C619=CC=CC=C619C620=CC=CC=C620C621=CC=CC=C621C622=CC=CC=C622C623=CC=CC=C623C624=CC=CC=C624C625=CC=CC=C625C626=CC=CC=C626C627=CC=CC=C627C628=CC=CC=C628C629=CC=CC=C629C630=CC=CC=C630C631=CC=CC=C631C632=CC=CC=C632C633=CC=CC=C633C634=CC=CC=C634C635=CC=CC=C635C636=CC=CC=C636C637=CC=CC=C637C638=CC=CC=C638C639=CC=CC=C639C640=CC=CC=C640C641=CC=CC=C641C642=CC=CC=C642C643=CC=CC=C643C644=CC=CC=C644C645=CC=CC=C645C646=CC=CC=C646C647=CC=CC=C647C648=CC=CC=C648C649=CC=CC=C649C650=CC=CC=C650C651=CC=CC=C651C652=CC=CC=C652C653=CC=CC=C653C654=CC=CC=C654C655=CC=CC=C655C656=CC=CC=C656C657=CC=CC=C657C658=CC=CC=C658C659=CC=CC=C659C660=CC=CC=C660C661=CC=CC=C661C662=CC=CC=C662C663=CC=CC=C663C664=CC=CC=C664C665=CC=CC=C665C666=CC=CC=C666C667=CC=CC=C667C668=CC=CC=C668C669=CC=CC=C669C670=CC=CC=C670C671=CC=CC=C671C672=CC=CC=C672C673=CC=CC=C673C674=CC=CC=C674C675=CC=CC=C675C676=CC=CC=C676C677=CC=CC=C677C678=CC=CC=C678C679=CC=CC=C679C680=CC=CC=C680C681=CC=CC=C681C682=CC=CC=C682C683=CC=CC=C683C684=CC=CC=C684C685=CC=CC=C685C686=CC=CC=C686C687=CC=CC=C687C688=CC=CC=C688C689=CC=CC=C689C690=CC=CC=C690C691=CC=CC=C691C692=CC=CC=C692C693=CC=CC=C693C694=CC=CC=C694C695=CC=CC=C695C696=CC=CC=C696C697=CC=CC=C697C698=CC=CC=C698C699=CC=CC=C699C700=CC=CC=C700C701=CC=CC=C701C702=CC=CC=C702C703=CC=CC=C703C704=CC=CC=C704C705=CC=CC=C705C706=CC=CC=C706C707=CC=CC=C707C708=CC=CC=C708C709=CC=CC=C709C710=CC=CC=C710C711=CC=CC=C711C712=CC=CC=C712C713=CC=CC=C713C714=CC=CC=C714C715=CC=CC=C715C716=CC=CC=C716C717=CC=CC=C717C718=CC=CC=C718C719=CC=CC=C719C720=CC=CC=C720C721=CC=CC=C721C722=CC=CC=C722C723=CC=CC=C723C724=CC=CC=C724C725=CC=CC=C725C726=CC=CC=C726C727=CC=CC=C727C728=CC=CC=C728C729=CC=CC=C729C730=CC=CC=C730C731=CC=CC=C731C732=CC=CC=C732C733=CC=CC=C733C734=CC=CC=C734C735=CC=CC=C735C736=CC=CC=C736C737=CC=CC=C737C738=CC=CC=C738C739=CC=CC=C739C740=CC=CC=C740C741=CC=CC=C741C742=CC=CC=C742C743=CC=CC=C743C744=CC=CC=C744C745=CC=CC=C745C746=CC=CC=C746C747=CC=CC=C747C748=CC=CC=C748C749=CC=CC=C749C750=CC=CC=C750C751=CC=CC=C751C752=CC=CC=C752C753=CC=CC=C753C754=CC=CC=C754C755=CC=CC=C755C756=CC=CC=C756C757=CC=CC=C757C758=CC=CC=C758C759=CC=CC=C759C760=CC=CC=C760C761=CC=CC=C761C762=CC=CC=C762C763=CC=CC=C763C764=CC=CC=C764C765=CC=CC=C765C766=CC=CC=C766C767=CC=CC=C767C768=CC=CC=C768C769=CC=CC=C769C770=CC=CC=C770C771=CC=CC=C771C772=CC=CC=C772C773=CC=CC=C773C774=CC=CC=C774C775=CC=CC=C775C776=CC=CC=C776C777=CC=CC=C777C778=CC=CC=C778C779=CC=CC=C779C780=CC=CC=C780C781=CC=CC=C781C782=CC=CC=C782C783=CC=CC=C783C784=CC=CC=C784C785=CC=CC=C785C786=CC=CC=C786C787=CC=CC=C787C788=CC=CC=C788C789=CC=CC=C789C790=CC=CC=C790C791=CC=CC=C791C792=CC=CC=C792C793=CC=CC=C793C794=CC=CC=C794C795=CC=CC=C795C796=CC=CC=C796C797=CC=CC=C797C798=CC=CC=C798C799=CC=CC=C799C800=CC=CC=C800C801=CC=CC=C801C802=CC=CC=C802C803=CC=CC=C803C804=CC=CC=C804C805=CC=CC=C805C806=CC=CC=C806C807=CC=CC=C807C808=CC=CC=C808C809=CC=CC=C809C810=CC=CC=C810C811=CC=CC=C811C812=CC=CC=C812C813=CC=CC=C813C814=CC=CC=C814C815=CC=CC=C815C816=CC=CC=C816C817=CC=CC=C817C818=CC=CC=C818C819=CC=CC=C819C820=CC=CC=C820C821=CC=CC=C821C822=CC=CC=C822C823=CC=CC=C823C824=CC=CC=C824C825=CC=CC=C825C826=CC=CC=C826C827=CC=CC=C827C828=CC=CC=C828C829=CC=CC=C829C830=CC=CC=C830C831=CC=CC=C831C832=CC=CC=C832C833=CC=CC=C833C834=CC=CC=C834C835=CC=CC=C835C836=CC=CC=C836C837=CC=CC=C837C838=CC=CC=C838C839=CC=CC=C839C840=CC=CC=C840C841=CC=CC=C841C842=CC=CC=C842C843=CC=CC=C843C844=CC=CC=C844C845=CC=CC=C845C846=CC=CC=C846C847=CC=CC=C847C848=CC=CC=C848C849=CC=CC=C849C850=CC=CC=C850C851=CC=CC=C851C852=CC=CC=C852C853=CC=CC=C853C854=CC=CC=C854C855=CC=CC=C855C856=CC=CC=C856C857=CC=CC=C857C858=CC=CC=C858C859=CC=CC=C859C860=CC=CC=C860C861=CC=CC=C861C862=CC=CC=C862C863=CC=CC=C863C864=CC=CC=C864C865=CC=CC=C865C866=CC=CC=C866C867=CC=CC=C867C868=CC=CC=C868C869=CC=CC=C869C870=CC=CC=C870C871=CC=CC=C871C872=CC=CC=C872C873=CC=CC=C873C874=CC=CC=C874C875=CC=CC=C875C876=CC=CC=C876C877=CC=CC=C877C878=CC=CC=C878C879=CC=CC=C879C880=CC=CC=C880C881=CC=CC=C881C882=CC=CC=C882C883=CC=CC=C883C884=CC=CC=C884C885=CC=CC=C885C886=CC=CC=C886C887=CC=CC=C887C888=CC=CC=C888C889=CC=CC=C889C890=CC=CC=C890C891=CC=CC=C891C892=CC=CC=C892C893=CC=CC=C893C894=CC=CC=C894C895=CC=CC=C895C896=CC=CC=C896C897=CC=CC=C897C898=CC=CC=C898C899=CC=CC=C899C900=CC=CC=C900C901=CC=CC=C901C902=CC=CC=C902C903=CC=CC=C903C904=CC=CC=C904C905=CC=CC=C905C906=CC=CC=C906C907=CC=CC=C907C908=CC=CC=C908C909=CC=CC=C909C910=CC=CC=C910C911=CC=CC=C911C912=CC=CC=C912C913=CC=CC=C913C914=CC=CC=C914C915=CC=CC=C915C916=CC=CC=C916C917=CC=CC=C917C918=CC=CC=C918C919=CC=CC=C919C920=CC=CC=C920C921=CC=CC=C921C922=CC=CC=C922C923=CC=CC=C923C924=CC=CC=C924C925=CC=CC=C925C926=CC=CC=C926C927=CC=CC=C927C928=CC=CC=C928C929=CC=CC=C929C930=CC=CC=C930C931=CC=CC=C931C932=CC=CC=C932C933=CC=CC=C933C934=CC=CC=C934C935=CC=CC=C935C936=CC=CC=C936C937=CC=CC=C937C938=CC=CC=C938C939=CC=CC=C939C940=CC=CC=C940C941=CC=CC=C941C942=CC=CC=C942C943=CC=CC=C943C944=CC=CC=C944C945=CC=CC=C945C946=CC=CC=C946C947=CC=CC=C947C948=CC=CC=C948C949=CC=CC=C949C950=CC=CC=C950C951=CC=CC=C951C952=CC=CC=C952C953=CC=CC=C953C954=CC=CC=C954C955=CC=CC=C955C956=CC=CC=C956C957=CC=CC=C957C958=CC=CC=C958C959=CC=CC=C959C960=CC=CC=C960C961=CC=CC=C961C96</chem> |                 |                      |                    |

## Supplementary Table

**Supplementary Table S1.** Performance of all the eight predictors (both training/testing and independent validation) using regression based approach developed using Random Forest along with the final descriptors employed individually

| Model used                        | Data Sets                                             | Feature<br>s | Pr-cor | RMS<br>E | MAE   |
|-----------------------------------|-------------------------------------------------------|--------------|--------|----------|-------|
| Chemicals<br>(Overall)            | Training/Testing data set<br>(T <sup>800</sup> )      | 265          | 0.52   | 24.22    | 18.46 |
|                                   | Independent Validation<br>data set (V <sup>84</sup> ) |              | 0.45   | 27.17    | 21.12 |
|                                   |                                                       |              |        |          |       |
| Gram-positive<br>bacteria         | Training/Testing data set<br>(T <sup>350</sup> )      | 177          | 0.68   | 22.03    | 16.11 |
|                                   | Independent Validation<br>data set (V <sup>34</sup> ) |              | 0.67   | 22.49    | 16.65 |
|                                   |                                                       |              |        |          |       |
| Gram-negative<br>bacteria         | Training/Testing data set<br>(T <sup>450</sup> )      | 387          | 0.57   | 23.95    | 18.87 |
|                                   | Independent Validation<br>data set (V <sup>48</sup> ) |              | 0.53   | 22.03    | 16.26 |
|                                   |                                                       |              |        |          |       |
| Fungus/Yeast                      | Training/Testing data set<br>(T <sup>140</sup> )      | 111          | 0.65   | 19.10    | 12.55 |
|                                   | Independent Validation<br>data set (V <sup>18</sup> ) |              | 0.53   | 17.33    | 11.57 |
|                                   |                                                       |              |        |          |       |
| <i>Pseudomonas<br/>aeruginosa</i> | Training/Testing data set<br>(T <sup>270</sup> )      | 81           | 0.65   | 21.79    | 16.51 |
|                                   | Independent Validation<br>data set (V <sup>31</sup> ) |              | 0.62   | 22.46    | 16.27 |
|                                   |                                                       |              |        |          |       |
| <i>Staphylococcus<br/>aureus</i>  | Training/Testing data set<br>(T <sup>210</sup> )      | 90           | 0.80   | 19.36    | 14.02 |
|                                   | Independent Validation<br>data set (V <sup>29</sup> ) |              | 0.78   | 16.74    | 12.15 |
|                                   |                                                       |              |        |          |       |
| <i>Candida<br/>albicans</i>       | Training/Testing data set<br>(T <sup>140</sup> )      | 76           | 0.63   | 19.15    | 12.83 |
|                                   | Independent Validation<br>data set (V <sup>12</sup> ) |              | 0.79   | 15.06    | 8.88  |

|                         |                                                    |    |      |       |       |
|-------------------------|----------------------------------------------------|----|------|-------|-------|
|                         |                                                    |    |      |       |       |
| <i>Escherichia coli</i> | Training/Testing data set (T <sup>93</sup> )       | 52 | 0.63 | 22.56 | 17.59 |
|                         | Independent Validation data set (V <sup>10</sup> ) |    | 0.86 | 17.40 | 13.59 |
